# Supplementary material for: Prevention of quality decline and delivery of siRNA using exogenous TCTP translocation across the zona pellucida in mouse oocytes
Source: PubMed Central journal article supplement (PMC6906282; doi:10.1038/s41598-019-55449-4), 2019-12-11
Supplement: 41598_2019_55449_MOESM1_ESM.pdf [file 41598_2019_55449_MOESM1_ESM.pdf]

## Supplementary Information

# Prevention of quality decline and delivery of siRNA using exogenous TCTP translocation across the zona pellucida in mouse oocytes

Hyuk-Joon Jeon<sup>1</sup>, Guang-Yu Bai<sup>1,2</sup>, Yuram Park<sup>1</sup>, Jae-Sung Kim<sup>3,\*</sup>, and Jeong Su Oh<sup>1,2,\*</sup>

<sup>1</sup>Department of Integrative Biotechnology, College of Biotechnology and Bioengineering, Sungkyunkwan University, Suwon, Korea

<sup>2</sup>Biomedical Institute for Convergence at SKKU (BICS), Sungkyunkwan University, Suwon, Korea

<sup>3</sup>Division of Radiation Biomedical Research, Korea Institute of Radiological and Medical Sciences, Seoul, KoreaTX

Corresponding authors: Department of Integrative Biotechnology, College of Biotechnology and Bioengineering, Sungkyunkwan University, Suwon, Korea. Email: [ohjs@skku.edu](mailto:ohjs@skku.edu); Division of Radiation Biomedical Research, Korea Institute of Radiological and Medical Sciences, Seoul, Korea. Email: [jaesung@kirams.re.kr](mailto:jaesung@kirams.re.kr)

# Supplementary Figure 1

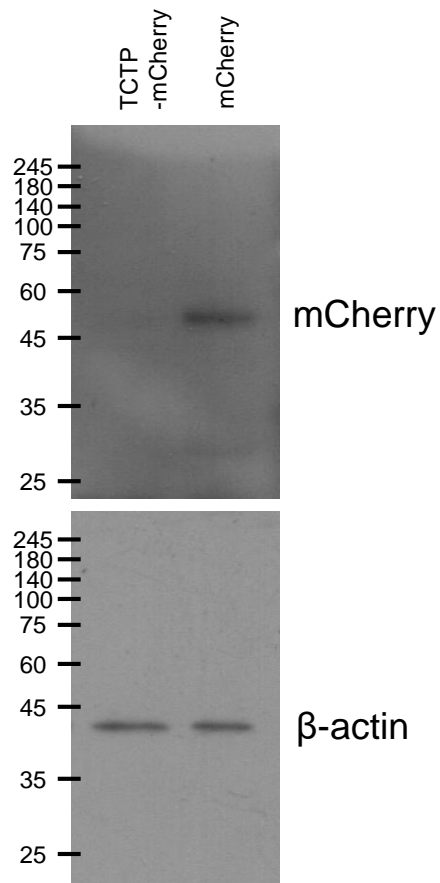

**Supplementary Figure 1.** Full-length blots for Fig. 1C

# Supplementary Figure 2

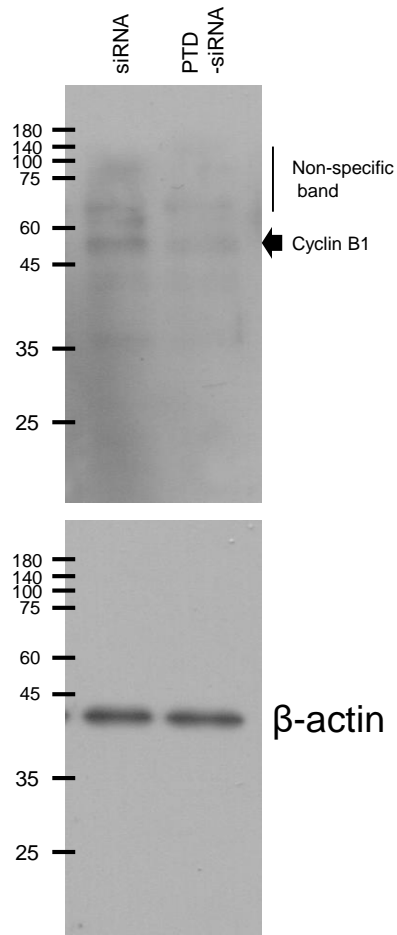

**Supplementary Figure 2.** Full-length blots for Fig. 4E.
